# Supplementary material for: CoC2O4·2H2O derived Co3O4nanorods array: a high-efficiency 1D electrocatalyst for alkaline oxygen evolution reaction
Source: Royal Society of Chemistry journal article supplement (doi:10.1039/c7cc08423d), 2018-01-01
Supplement: c7cc08423d1.pdf [file c7cc08423d1.pdf]

## Electronic Supplementary Information

### Experimental section

**Materials:** Pure Co foil (>99.95%, Sigma-Aldrich) was used as a starting substance for the fabrication of cobalt complexes. H<sub>2</sub>C<sub>2</sub>O<sub>4</sub> were purchased from Aladdin Ltd. in Shanghai. Acetone and ethanol were purchased from Tianjin Chemical Corporation. RuCl<sub>3</sub>·3H<sub>2</sub>O and Nafion (5 wt%) were bought from Sigma-Aldrich Chemical Reagent Co., Ltd. All chemical reagents were used as received without further purification. The water used throughout all experiments was purified through a Millipore system.

**Preparation of Co<sub>3</sub>O<sub>4</sub> NA/CF:** CoC<sub>2</sub>O<sub>4</sub>·2H<sub>2</sub>O NA/CF was prepared as follows. In a typical synthesis, a piece of Co foil (1 cm × 2 cm, thickness: 0.5 mm) was well cleaned by sonication sequentially in acetone, water and ethanol for 10 min each before use, and was immediately dried in the oven at 50 °C for 5 min. CoC<sub>2</sub>O<sub>4</sub>·2H<sub>2</sub>O NA/CF were electrodeposited in (0.05 M, 50 mL) H<sub>2</sub>C<sub>2</sub>O<sub>4</sub> solution, with potential of 1.0 V for 150 min at 25 °C. The CoC<sub>2</sub>O<sub>4</sub>·2H<sub>2</sub>O array was converted to Co<sub>3</sub>O<sub>4</sub> by thermal decomposition under Ar conditions at 400 °C for 2 h. The weight increment (x mg) of Co foil can be directly weighted after the growth of Co<sub>3</sub>O<sub>4</sub>. Co<sub>3</sub>O<sub>4</sub> loading = x mg (M<sub>Co<sub>3</sub>O<sub>4</sub></sub>/M<sub>O</sub>) = x mg (240/16) = 15x mg, where M is the molecular weight or atomic weight. For Co<sub>3</sub>O<sub>4</sub> NA/CF electrode, the loading mass of Co<sub>3</sub>O<sub>4</sub> is about 1.9 mg cm<sup>-2</sup>. To investigate the formation processes, morphology changes and electrocatalytic performance for CoC<sub>2</sub>O<sub>4</sub>·2H<sub>2</sub>O NA/CF, different reaction times (10, 70, and 150 min) and potentials (0.5 and 1.0 V) were used while keeping other parameters unchanged. These redox reactions may be:

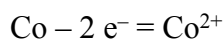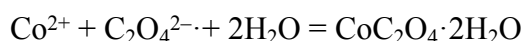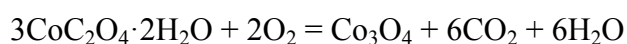

**Synthesis of Co<sub>3</sub>O<sub>4</sub> sheets:** 1 g of Co(CH<sub>3</sub>COO)<sub>2</sub>·4H<sub>2</sub>O, and 0.05 g of PVP (M<sub>w</sub> = 30000 g/mol) were loaded into a 100 mL poly(tetrafluoroethylene) (PTFE)-lined stainless steel autoclave, which was then filled with 80 mL mixture solution of ethylene glycol and water. The autoclave was sealed and maintained at 180 °C for 12

h, and then cooled down to room temperature. The final products were centrifuged, rinsed with distilled water and ethanol several times to remove any impurities. The as-prepared precursors were finally calcined at 350 °C in N<sub>2</sub> for 3 h.

**Synthesis of Co<sub>3</sub>O<sub>4</sub> spheres:** 1 g of Co(CH<sub>3</sub>COO)<sub>2</sub>·4H<sub>2</sub>O and 0.05 g of PVP (M<sub>w</sub> = 30000 g/mol) were loaded into a 100 mL poly(tetrafluoroethylene) (PTFE)-lined stainless steel autoclave, which was then filled with 80 mL ethylene glycol. The autoclave was sealed and maintained at 180 °C for 12 h, and then cooled down to room temperature. The final products were centrifuged, rinsed with distilled water and ethanol several times to remove any impurities. The as-prepared precursors were finally calcined at 350 °C in N<sub>2</sub> for 3 h.

**Synthesis of RuO<sub>2</sub>:** RuO<sub>2</sub> was prepared in accordance with reported work.<sup>1</sup> Briefly, 2.61 g of RuCl<sub>3</sub>·3H<sub>2</sub>O and 1.0 mL KOH (1.0 M) were added into 100 mL distilled water and stirred for 45 min at 100 °C. Then the above solution was centrifuged for 10 minutes and filtered. The precipitates were collected by centrifugation and washed with water for several times, followed by drying at 70 °C. Finally, the product was annealed at 300 °C for 3 h under air atmosphere. RuO<sub>2</sub> ink was prepared by dispersing 20 mg of catalyst into 490 μL of water/ethanol (v/v = 1:1) and 10 μL of 5 wt% Nafion using sonication for 30 min. Then 11.3 μL of the RuO<sub>2</sub> ink (containing 452 μg of RuO<sub>2</sub>) was loaded onto a bare Co foil of 0.25 cm<sup>2</sup> in geometric area (loading: 1.9 mg cm<sup>-2</sup>).

**Characterizations:** The XRD patterns were obtained from a LabX XRD-6100 X-ray diffractometer with Cu Kα radiation (40 kV, 30 mA) of wavelength 0.154 nm (SHIMADZU, Japan). Scanning electron microscope (SEM) measurements were recorded on a XL30 ESEM FEG scanning electron microscope at an accelerating voltage of 20 kV. The structures of the samples were determined by transmission electron microscopy (TEM) images collected on a HITACHI H-8100 electron microscopy (Hitachi, Tokyo, Japan) operated at 200 kV. X-ray photoelectron spectroscopy (XPS) data of the samples was collected on an ESCALABMK II X-ray photoelectron spectrometer using Mg as the exciting source. Brunauer-Emmett-Teller (BET) measurements were performed by using N<sub>2</sub> absorption method with a

Micromeritics Tristar II 3020 instrument at 77 K. All the samples were degassed at 150 °C under vacuum for over 6 h.

**Electrochemical measurements:** Electrochemical measurements were performed with a CHI 660E electrochemical analyzer (CH Instruments, Inc., Shanghai) in a standard three-electrode system. Co<sub>3</sub>O<sub>4</sub> NA/CF foil was used as the working electrode. A graphite plate and Hg/HgO were used as the counter electrode and the reference electrode, respectively. The temperature of solution was kept at 25 °C for all the measurements via the adjustment of air condition and heating support, which ensured the variation of diffusion coefficient below 1%. The potentials reported in this work were calibrated to RHE other than especially explained, using the following equation:  $E(\text{RHE}) = E(\text{Hg/HgO}) + (0.098 + 0.059 \text{ pH}) \text{ V}$ . Electrochemical preparation curves were obtained by amperometric i-t curve with a scan rate of 100 mV s<sup>-1</sup>.

**Tafel plots calculation:** The Tafel plots are employed to evaluate the OER catalytic kinetics and fitted with the following equation (1):

$$\eta = b \log j + a \quad (1)$$

Where  $j$  is the current density and  $b$  is the Tafel slope.

**TOF calculation:** The TOF is quantified the concentration of active site and calculates by the equation (2):

$$\text{TOF} = jA/4Fm \quad (2)$$

Where  $j$  is current density (A cm<sup>-2</sup>) at defined overpotential;  $A$  is the geometric area of the testing electrode; 4 indicates the mole of electrons consumed for evolving one mole O<sub>2</sub> from water;  $F$  is the Faradic constant (96485 C mol<sup>-1</sup>);  $m$  is the number of active sites (mol), which can be extracted from the linear relationship between the oxidation peak currents and scan rates by the equation (3):

$$\text{slope} = n^2F^2m/4RT \quad (3)$$

Where  $n$  is the numbers of electron transferred;  $R$  and  $T$  are the ideal gas constant and the absolute temperature, respectively.

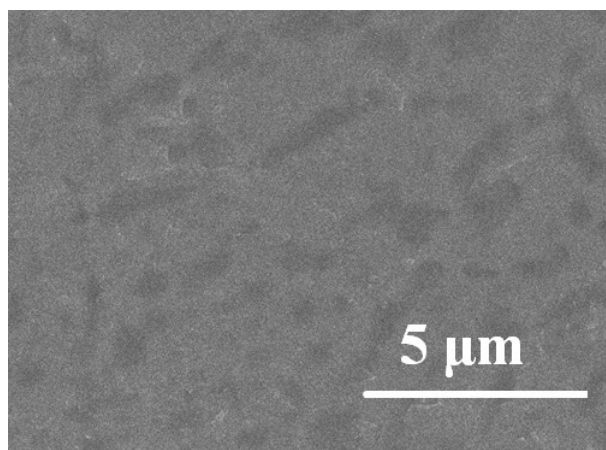

**Fig. S1.** SEM image of bare Co foil.

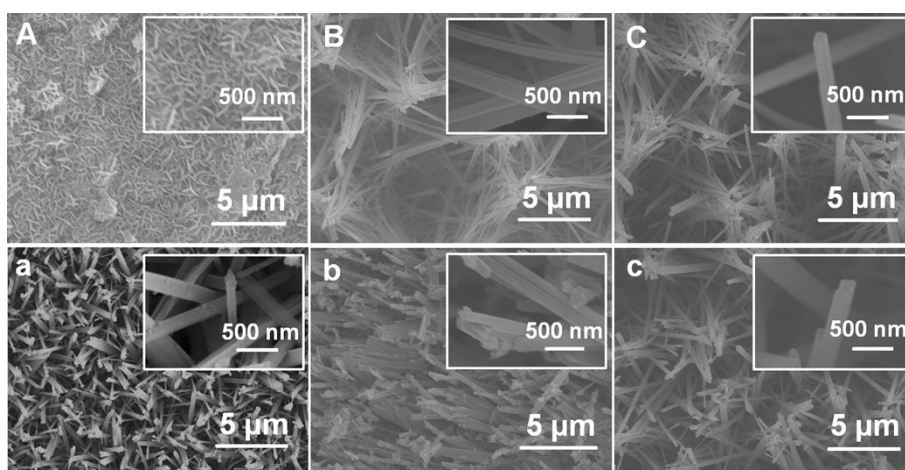

**Fig. S2.** SEM images of  $\text{CoC}_2\text{O}_4 \cdot 2\text{H}_2\text{O}$  NA/CF with different electrodeposited condition in 0.05 M  $\text{H}_2\text{C}_2\text{O}_4$  solution: 10 min (A and a), 70 min (B and b), 150 min (C and c), 0.5 V (A, B and C), 1.0 V (a, b and c).

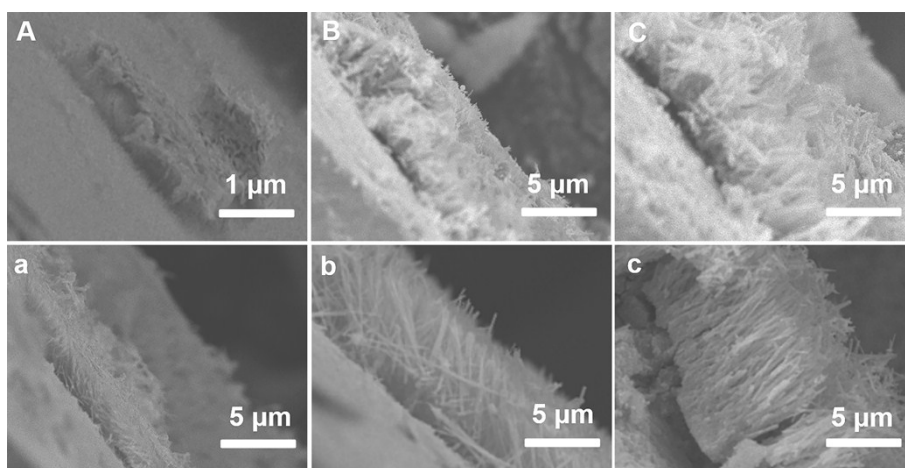

**Fig. S3.** Side-viewed SEM images of  $\text{CoC}_2\text{O}_4 \cdot 2\text{H}_2\text{O}$  NA/CF with different electrodeposited condition in 0.05 M  $\text{H}_2\text{C}_2\text{O}_4$  solution: 10 min (A and a), 70 min (B and b), 150 min (C and c), 0.5 V (A, B and C), 1.0 V (a, b and c).

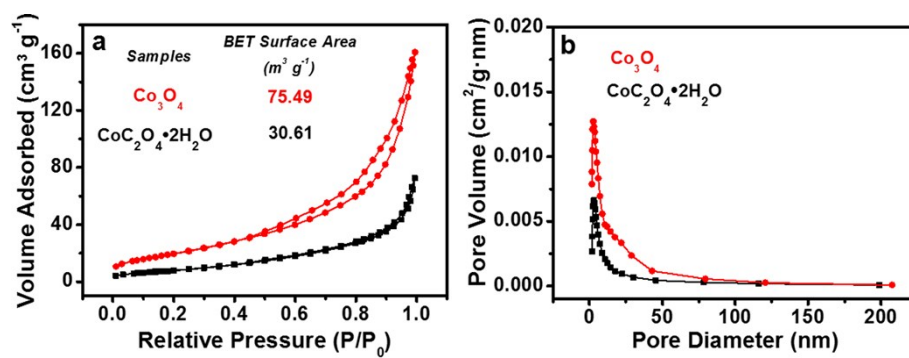

**Fig. S4.** Nitrogen adsorption-desorption isotherms (a) and the corresponding pore size distribution (b).



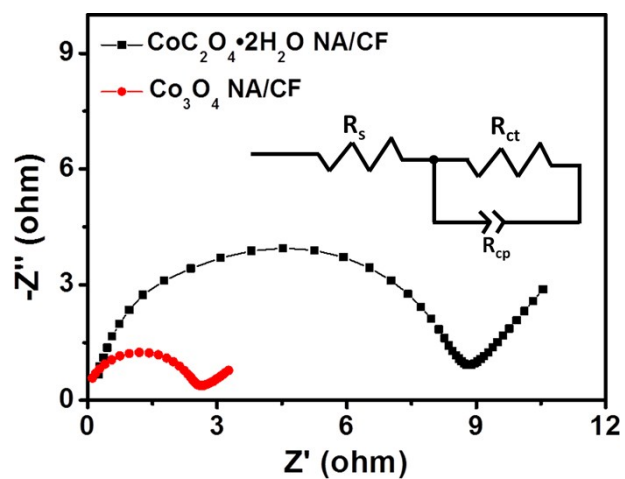

**Fig. S5.** Nyquist plots for  $\text{CoC}_2\text{O}_4 \cdot 2\text{H}_2\text{O}$  NA/CF and  $\text{Co}_3\text{O}_4$  NA/CF in the frequency range from 0.01 to  $10^6$  Hz at open circuit potential (0.251 V vs. Hg/HgO) in 1.0 M KOH.

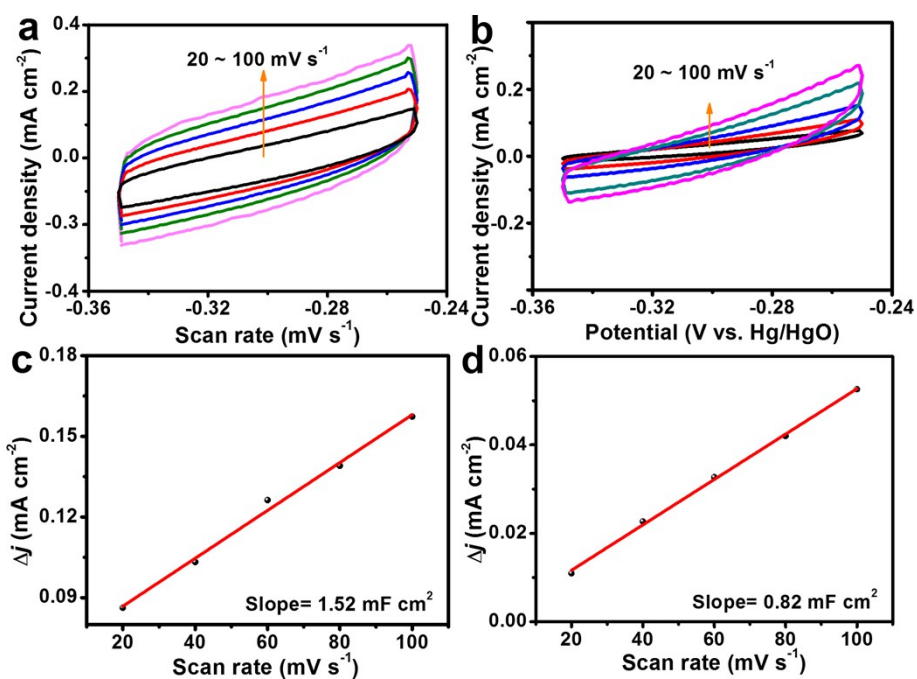

**Fig. S6.** CVs for (a) Co<sub>3</sub>O<sub>4</sub> NA/CF and (b) CoC<sub>2</sub>O<sub>4</sub>·2H<sub>2</sub>O NA/CF in the non-faradaic capacitance current range at scan rates of 20, 40, 60, 80, and 100 mV s<sup>-1</sup>. Corresponding capacitive currents at -0.30 V vs. Hg/HgO as a function of scan rates for (c) Co<sub>3</sub>O<sub>4</sub> NA/CF and (d) CoC<sub>2</sub>O<sub>4</sub>·2H<sub>2</sub>O NA/CF.

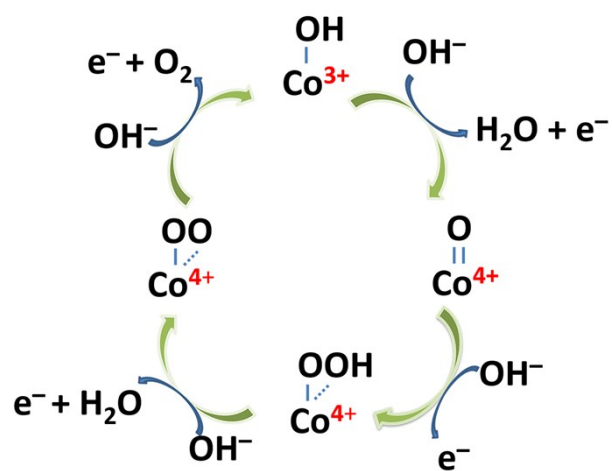

**Fig. S7.** Scheme of the proposed OER mechanism on  $\text{Co}_3\text{O}_4$ .

**Table S1.** Comparison of OER performance for Co<sub>3</sub>O<sub>4</sub> NA/CF with other Co-based WOCs in alkaline media.

| Catalyst                                                         | $j$ (mA cm <sup>-2</sup> ) | $\eta$ (mV) | Electrolyte | Ref.      |
|------------------------------------------------------------------|----------------------------|-------------|-------------|-----------|
| Co <sub>3</sub> O <sub>4</sub> NA/CF                             | 15                         | 308         | 1.0 M KOH   | This work |
|                                                                  | 50                         | 343         |             |           |
|                                                                  | 15                         | 347         | 0.1 M KOH   |           |
|                                                                  | 50                         | 379         |             |           |
| Co <sub>3</sub> O <sub>4</sub> nanocrystal /carbon paper         | 50                         | 420         | 1.0 M KOH   | 2         |
| Co@Co <sub>3</sub> O <sub>4</sub> /NC                            | 25                         | ~390        | 0.1 M KOH   | 3         |
| CoO <sub>x</sub> NPs/BNG                                         | 25                         | ~340        | 0.1 M KOH   | 4         |
| Co-CNT/PC                                                        | 25                         | ~390        | 0.1 M KOH   | 5         |
| Co <sub>3</sub> O <sub>4</sub> C-NA                              | 25                         | ~350        | 0.1 M KOH   | 6         |
| Co <sub>3</sub> O <sub>4</sub> /NiCo <sub>2</sub> O <sub>4</sub> | 50                         | ~418        | 1.0 M KOH   | 7         |
| Co <sub>3</sub> O <sub>4</sub>                                   | 25                         | ~326        | 1.0 M KOH   | 8         |
| Co <sub>3</sub> O <sub>4</sub> -MTA                              | 150                        | 360         | 1.0 M KOH   | 9         |
| Co <sub>3</sub> O <sub>4</sub> /MNTs                             | 25                         | ~373        | 1.0 M KOH   | 10        |
| Co-P films                                                       | 25                         | 365         | 1.0 M KOH   | 11        |
| Co-S nanosheets                                                  | 50                         | 410         | 1.0 M KOH   | 12        |
| NiCo <sub>2</sub> S <sub>4</sub> nanowires                       | 100                        | 340         | 1.0 M KOH   | 13        |
| NiCo LDH                                                         | 50                         | 440         | 1.0 M KOH   | 14        |
| Hierarchical Zn <sub>x</sub> Co <sub>3-x</sub> O <sub>4</sub>    | 50                         | 400         | 1.0 M KOH   | 15        |
| Au@Co <sub>3</sub> O <sub>4</sub> Core-Shell                     | 25                         | 370         | 0.1 M KOH   | 16        |
| Cobalt carbonate hydroxide                                       | 30                         | 720         | 0.1 M KOH   | 17        |
| Co <sub>3</sub> O <sub>4</sub> /carbon porous nanowire           | 50                         | 390         | 0.1 M KOH   | 18        |
| Cobalt carbonate hydroxide/MWCNT                                 | 50                         | 353         | 0.1 M KOH   | 19        |
| CeO <sub>2</sub> /CoSe <sub>2</sub>                              | 30                         | 338         | 0.1 M KOH   | 20        |
| Cu <sub>x</sub> Co <sub>3-x</sub> O <sub>4</sub> nanoparticles   | 100                        | 367         | 1.0 M KOH   | 21        |
| Co <sub>3</sub> O <sub>4</sub> nanoparticles                     | 50                         | 510         | 0.1 M KOH   | 22        |
| mesoporous Co <sub>3</sub> O <sub>4</sub>                        | 100                        | 525         | 1.0 M KOH   | 23        |
| graphene-CoO nanohybrids                                         | 15                         | 430         | 0.1 M KOH   | 24        |
| NiCo <sub>2</sub> S <sub>4</sub> @graphene                       | 30                         | 470         | 1.0 M KOH   | 25        |
| Mn <sub>3</sub> O <sub>4</sub> /CoSe <sub>2</sub>                | 50                         | 450         | 1.0 M KOH   | 26        |

## References

- 1 J. C. Cruz, V. Baglio, S. Siracusano, V. Antonucci, A. S. Aricò, R. Ornelas, L. Ortiz-Frade, G. Osorio-Monreal, S. M. Durón-Torres and L. G. Arriaga, *Int. J. Electrochem. Sci.*, 2011, **6**, 6607–6619.
- 2 S. Du, Z. Ren, J. Zhang, J. Wu, W. Xi, J. Zhu and H. Fu, *Chem. Commun.*, 2015, **51**, 8066–8069.
- 3 A. Aijaz, J. Masa, C. Rösler, W. Xia, P. Weidel, A. J. R. Botz, R. A. Fischer, W. Schuhmann and M. Muhler, *Angew. Chem., Int. Ed.*, 2016, **55**, 4087–4091.
- 4 Y. Tong, P. Chen, T. Zhou, K. Xu, W. Chu, C. Wu and Y. Xie, *Angew. Chem., Int. Ed.*, 2017, **56**, 7121–7125.
- 5 S. Dou, X. Li, L. Tao, J. Hou and S. Wang, *Chem. Commun.*, 2016, **52**, 9727–9730.
- 6 T. Ma, S. Dai, M. Jaroniec and S. Qiao, *J. Am. Chem. Soc.*, 2014, **136**, 13925–13931.
- 7 H. Hu, B. Guan, B. Xia and X. Lou, *J. Am. Chem. Soc.*, 2015, **137**, 5590–5595.
- 8 Y. Wang, T. Zhou, K. Jiang, P. Da, Z. Peng, J. Tang, B. Kong, W. Cai, Z. Yang and G. Zheng, *Adv. Energy Mater.*, 2014, **4**, 1400696.
- 9 Y. Zhu, T. Ma, M. Jaroniec and S. Qiao, *Angew. Chem., Int. Ed.*, 2017, **56**, 1324–1328.
- 10 H. Wang, S. Zhuo, Y. Liang, X. Han and B. Zhang, *Angew. Chem., Int. Ed.*, 2016, **55**, 9055–9059.
- 11 N. Jiang, B. You, M. Sheng and Y. Sun, *Angew. Chem., Int. Ed.*, 2015, **54**, 6251–6254.
- 12 T. Liu, Y. Liang, Q. Liu, X. Sun, Y and A. M. Asiri, *Electrochem. Commun.*, 2015, **60**, 92–96.
- 13 D. Liu, Q. Lu, Y. Luo, X. Sun and A. M. Asiri, *Nanoscale*, 2015, **7**, 15122–15126.
- 14 H. Liang, F. Meng, M. Acevedo, L. Li, A. Forticaus, L. Xiu, Z. Wang and S. Jin, *Nano Lett.*, 2015, **15**, 1421–1427.

- 15 X. Liu, Z. Chang, L. Luo, T. Xu, X. Lei, J. Liu and X. Sun, *Chem. Mater.*, 2014, **6**, 1889–1895.
- 16 Z. Zhuang, W. Sheng and Y. Yan, *Adv. Mater.*, 2014, **26**, 3950–3955.
- 17 Y. Wang, W. Ding, S. Chen, Y. Nie, K. Xiong and Z. Wei, *Chem. Commun.*, 2014, **50**, 15529–15532.
- 18 T. Ma, S. Dai, M. Jaroniec and S. Qiao, *J. Am. Chem. Soc.*, 2014, **136**, 13925–13931.
- 19 Y. Zhang, Q. Xiao, X. Guo, X. Zhang, Y. Xue, L. Jing, X. Zhai, Y. Yan and K. Sun, *J. Power Sources*, 2015, **278**, 464–472.
- 20 Y. Zheng, M. Gao, Q. Gao, H. Li, J. Xu, Z. Wu and S. Yu, *Small*, 2015, **11**, 182–188.
- 21 X. Wu and K. Scott, *J. Mater. Chem.*, 2011, **21**, 12344–12351.
- 22 X. Lu and C. Zhao, *J. Mater. Chem. A*, 2013, **1**, 12053–12059.
- 23 H. Tuysuz, Y. J. Hwang, S. B. Khan, A. M. Asiri and P. Yang, *Nano Res.*, 2013, **6**, 47–54.
- 24 S. Mao, Z. Wen, T. Huang, Y. Hou and J. Chen, *Energy Environ. Sci.*, 2014, **7**, 609–616.
- 25 Q. Liu, J. Jin and J. Zhang, *ACS Appl. Mater. Interfaces*, 2013, **5**, 5002–5008.
- 26 M. R. Gao, Y. F. Xu, J. Jiang, Y. R. Zheng and S. H. Yu, *J. Am. Chem. Soc.*, 2012, **134**, 2930–2939.
